# Supplementary material for: Automating the Identification of Feedback Quality Criteria and the CanMEDS Roles in Written Feedback Comments Using Natural Language Processing
Source: PubMed Central journal article supplement (PMC10742245; doi:10.5334/pme.1056), 2023-12-18
Supplement: pme-12-1-1056-s2.pdf [file pme-12-1-1056-s2.pdf]

## Appendix B. Structured categorisation matrix quality criteria

| <b>Code</b>        | <b>Definition</b>                                                                                                                                                                                                                                                          |
|--------------------|----------------------------------------------------------------------------------------------------------------------------------------------------------------------------------------------------------------------------------------------------------------------------|
| <i>Performance</i> | The task on which the feedback is provided. This task must be observable.                                                                                                                                                                                                  |
| <i>Judgment</i>    | An adjective used to denote the gap between the performance and a standard.<br>It is an evaluative statement expressed as a judgment on past performance.                                                                                                                  |
| <i>Elaboration</i> | Informative statement that builds further on the judgment expressed as a question, confirmation, suggestion, or justification... (e.g. it indicates what went well or did not go well, why it went well or not...). In doing so, it gives more details about the judgment. |
| <i>Improvement</i> | The aim of feedback is to improve the trainee's performance. The feedback must suggest strategies for improvement.                                                                                                                                                         |
