# Supplementary material for: Automating the Identification of Feedback Quality Criteria and the CanMEDS Roles in Written Feedback Comments Using Natural Language Processing
Source: PubMed Central journal article supplement (PMC10742245; doi:10.5334/pme.1056), 2023-12-18
Supplement: pme-12-1-1056-s3.pdf [file pme-12-1-1056-s3.pdf]

### Appendix C. Cohen's Kappa values for manual labelling

| Code                    | Cohen's Kappa value |
|-------------------------|---------------------|
| <b>Quality criteria</b> |                     |
| <i>Performance</i>      | 0.77                |
| <i>Judgment</i>         | 0.68                |
| <i>Elaboration</i>      | 0.24                |
| <i>Improvement</i>      | 0.83                |
| <b>CanMEDS roles</b>    |                     |
| <i>Medical Expert</i>   | 0.63                |
| <i>Communicator</i>     | 0.62                |
| <i>Collaborator</i>     | 0.60                |
| <i>Leader</i>           | 0.51                |
| <i>Health Advocate</i>  | 0.50                |
| <i>Scholar</i>          | 0.63                |
| <i>Professional</i>     | 0.21                |
