# Supplementary material for: Automating the Identification of Feedback Quality Criteria and the CanMEDS Roles in Written Feedback Comments Using Natural Language Processing
Source: PubMed Central journal article supplement (PMC10742245; doi:10.5334/pme.1056), 2023-12-18
Supplement: pme-12-1-1056-s4.pdf [file pme-12-1-1056-s4.pdf]

**Appendix D. Data distribution regarding the feedback quality criteria and CanMEDS roles throughout the training, development and test dataset.**

| Label                     | # sentences in which the label occurred (%) |                 |             |               |
|---------------------------|---------------------------------------------|-----------------|-------------|---------------|
| Feedback quality criteria | Training set                                | Development set | Test set    | Total         |
| <i>Performance</i>        | 3,961 (45.45)                               | 860 (46.04)     | 832 (44.54) | 5,653 (45.40) |
| <i>Judgment</i>           | 3,251 (37.30)                               | 709 (37.96)     | 688 (36.83) | 4,648 (37.33) |
| <i>Elaboration</i>        | 622 (7.14)                                  | 146 (7.82)      | 129 (6.91)  | 897 (7.20)    |
| <i>Improvement</i>        | 2,801 (32.14)                               | 559 (29.93)     | 606 (32.44) | 3,966 (31.85) |
| <b>CanMEDS roles</b>      |                                             |                 |             |               |
| <i>Medical Expert</i>     | 4,084 (46.86)                               | 837 (44.81)     | 856 (45.82) | 5,777 (46.39) |
| <i>Communicator</i>       | 989 (11.35)                                 | 216 (11.56)     | 204 (10.92) | 1,409 (11.32) |
| <i>Collaborator</i>       | 779 (8.94)                                  | 163 (8.73)      | 171 (9.15)  | 1,113 (8.94)  |
| <i>Leader</i>             | 237 (2.72)                                  | 44 (2.36)       | 47 (2.52)   | 328 (2.63)    |
| <i>Health Advocate</i>    | 247 (2.83)                                  | 56 (3.00)       | 66 (3.53)   | 369 (2.96)    |
| <i>Scholar</i>            | 870 (9.98)                                  | 182 (9.74)      | 201 (10.76) | 1,253 (10.06) |

*Professional*

377 (4.33)

77 (4.12)

87 (4.66)

541 (4.34)

---
